# Supplementary material
Source: PubMed Central journal article supplement (PMC4247569)
Supplement: supp_tpc.114.129296_tpc129296_Supplemental.pdf [file supp_tpc.114.129296_tpc129296_Supplemental.pdf]

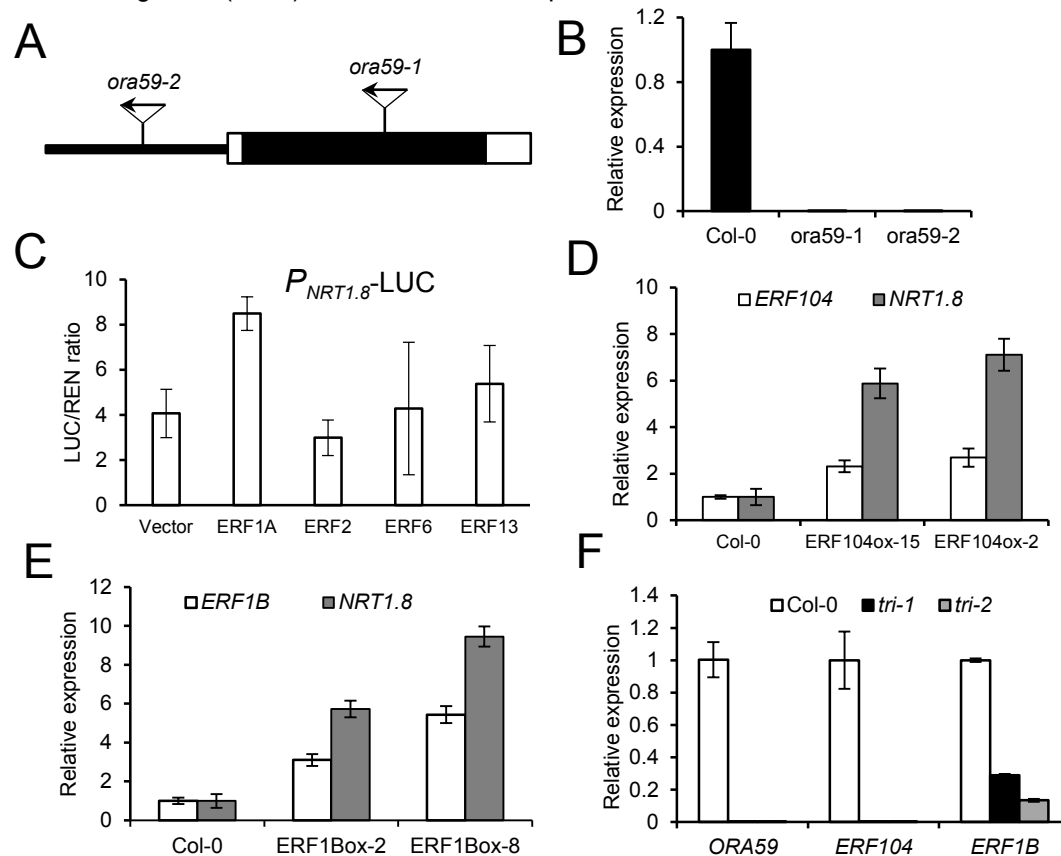

**Supplemental Figure 1. ERF family members function redundantly in the regulation of *NRT1.8* expression**

**(A)** Schematic map of the T-DNA insertion sites in *ora59-1* and *ora59-2* mutants. Closed box and open boxes represent coding region and untranslated regions (UTRs), respectively.

**(B)** Quantitative RT-PCR analysis of *ORA59* expression in *ora59* mutant plants. Values are mean  $\pm$  SD, n = 3.

**(C)** Transient transcriptional activity assay of  $P_{NRT1.8}$ :LUC expression. The  $P_{NRT1.8}$ :LUC-35S:REN reporter construct was transiently expressed in *Arabidopsis* protoplasts together with the control vector, 35S:ERF1A, 35S:ERF2, 35S:ERF6 or 35S:ERF13 effectors, respectively. The expression of REN was used as an internal control. LUC/REN ratio represents the relative activity of the *NRT1.8* promoter. Values are mean  $\pm$  SD, n = 3.

**(D)** and **(E)** Quantitative RT-PCR analysis of *NRT1.8* expression in roots of 4-week-old *ERF104*-overexpressing **(D)** or *ERF1B*-overexpressing **(E)** plants grown in hydroponics. Values are mean  $\pm$  SD, n = 3.

**(F)** Characterization of the triple mutant lines *tri-1* and *tri-2*, in which *ORA59* and *ERF104* showed undetectable mRNA, while *ERF1B* showed essentially reduced mRNA level. Values are mean  $\pm$  SD, n = 3.

A

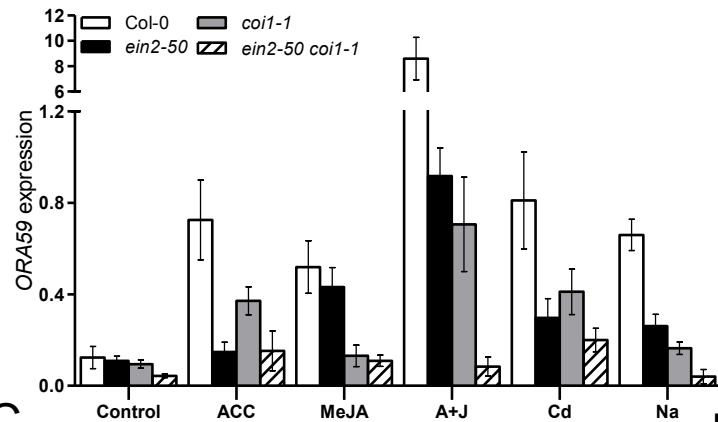

B

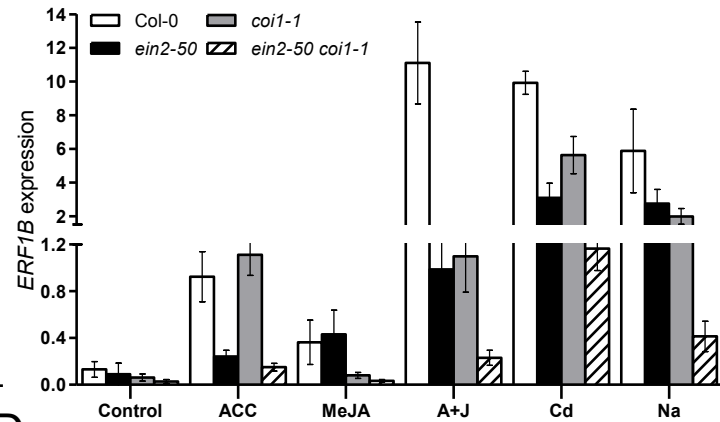

C

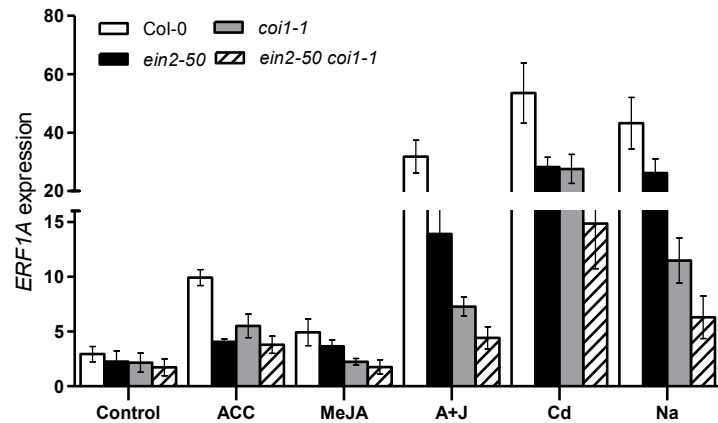

D

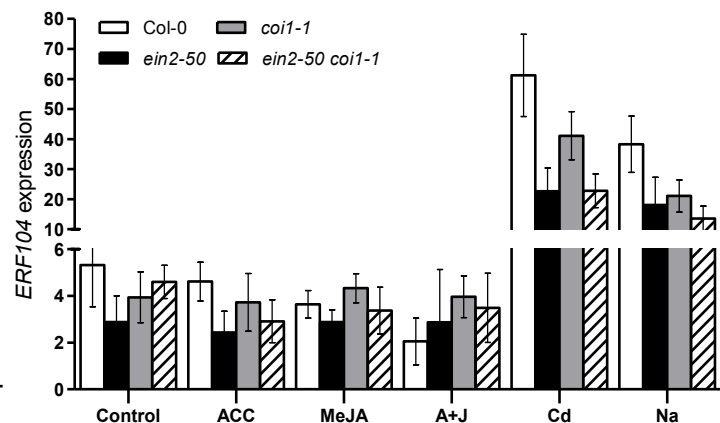

### Supplemental Figure 2. *ERF* expression upon stress/hormone treatment in the ET/JA mutants

Quantitative RT-PCR analysis of *ORA59* (A), *ERF1B* (B), *ERF1A* (C) and *ERF104* (D) expression in the roots of 4-week-old WT, *ein2-50*, *coi1-1* and *ein2-50 coi1-1* plants treated with 20  $\mu$ M ACC, 50  $\mu$ M MeJA, 20  $\mu$ M ACC+50  $\mu$ M MeJA (A+J), 200  $\mu$ M CdCl<sub>2</sub> and 150 mM NaCl for 6 h. Data were normalized to those of *SAND*. Values are mean  $\pm$  SD, n = 3.

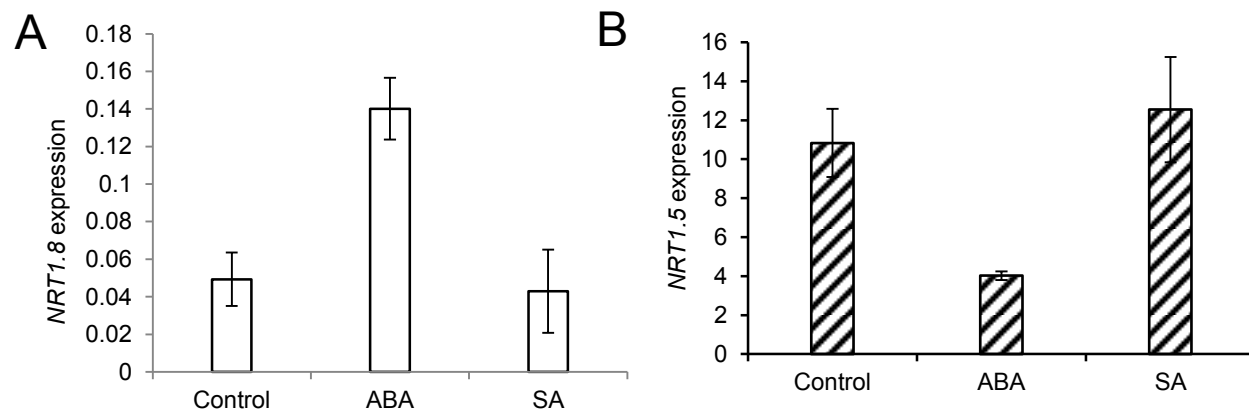

**Supplemental Figure 3. *NRT1.5* and *NRT1.8* expression in response to SA or ABA treatment**

Quantitative RT-PCR analysis of *NRT1.8* (A) and *NRT1.5* (B) expression in roots of 4-week-old Col-0 exposed to 50  $\mu$ M ABA or 1 mM SA for 6 h. Data were normalized to those of *SAND*. Values are mean  $\pm$  SD, n = 3.

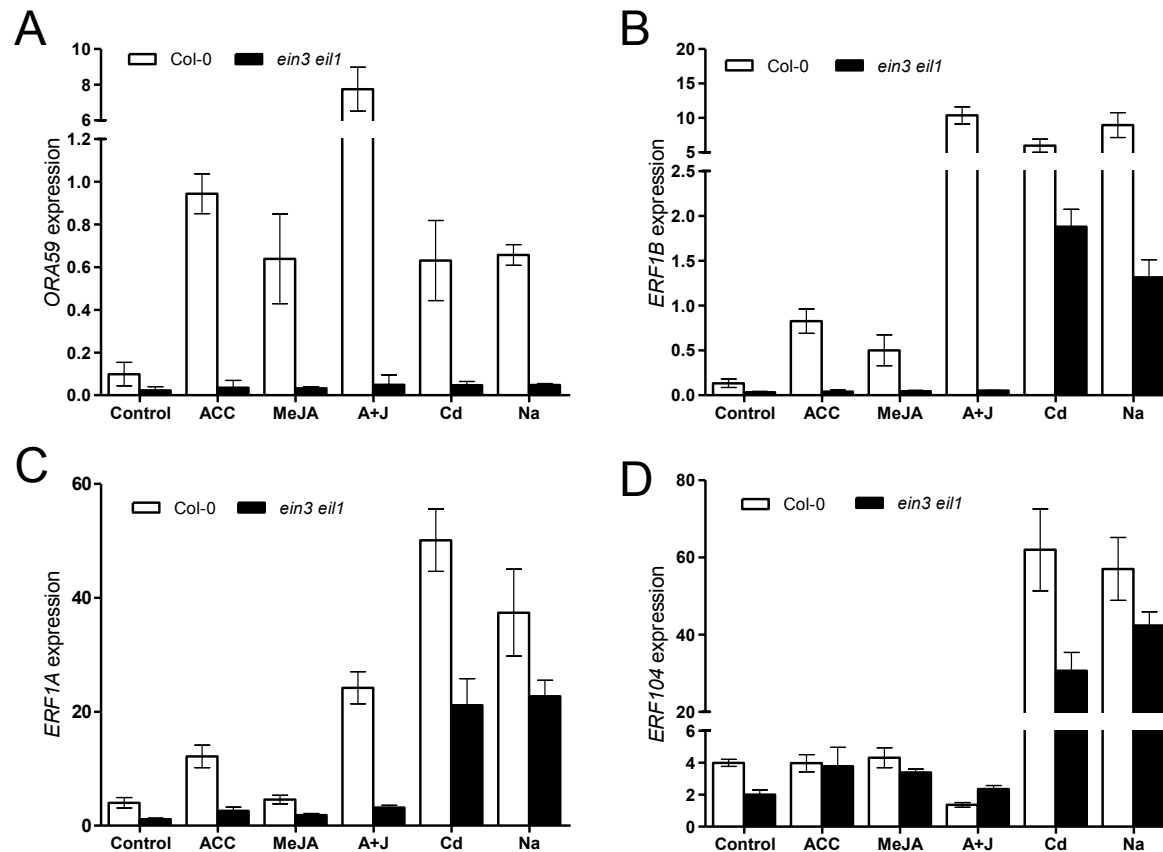

**Supplemental Figure 4. The expression of *ERFs* in the *ein3 eil1* mutant in response to different treatments**

Quantitative RT-PCR analysis of *ORA59* (A), *ERF1B* (B), *ERF1A* (C) and *ERF104* (D) expression in the roots of 4-week-old WT, *ein3 eil1* plants treated with 20  $\mu$ M ACC, 50  $\mu$ M MeJA, 20  $\mu$ M ACC+50  $\mu$ M MeJA (A+J), 200  $\mu$ M CdCl<sub>2</sub> or 150 mM NaCl for 6 h. Data were normalized to those of *SAND*. Values are mean  $\pm$  SD, n = 3.

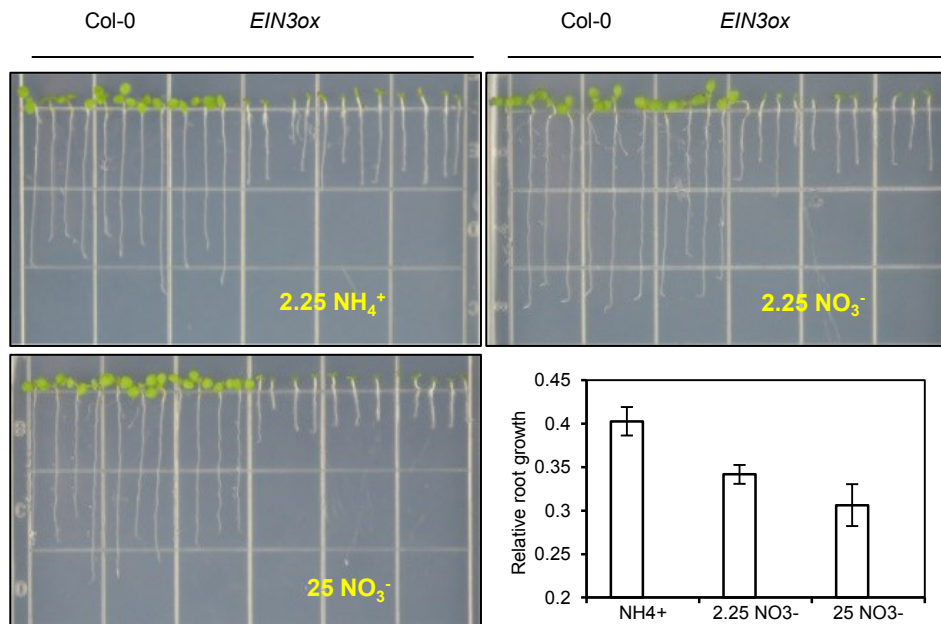

**Supplemental Figure 5. Root growth of *EIN3* overexpressing lines under non-stressed conditions**

Seedlings were germinated and allowed to grow as described in Figure 8. Relative root growth was defined as the root elongation of *EIN3* overexpressing line *EIN3ox* plants against those of wild type control *Col-0*. Values are mean  $\pm$  SE, n = 5.

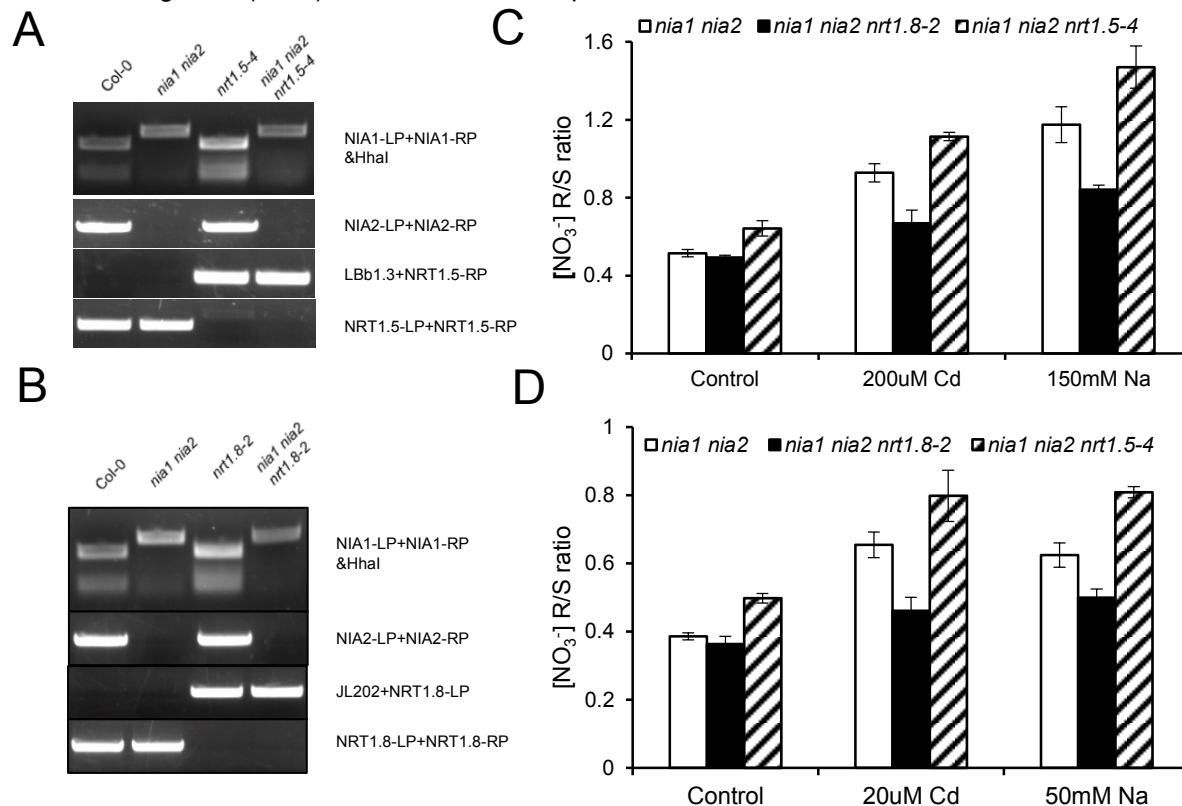

### Supplemental Figure 6. Nitrate reallocation upon stresses in *nrt1.8* and *nrt1.5* mutants in the *nia1 nia2* background

(A) and (B) PCR-based genotyping of *nrt1.5-4 nia1 nia2* (A) and *nrt1.8-2 nia1 nia2* (B) mutant plants. A region containing the nucleotide mutation (G to A) of *nia1* was amplified and further digested with *HhaI* to identify *nia1* mutants. Specific primers located in the deleted region of *NIA2* were designed to identify *nia2* mutants. Both *nrt1.5-4* and *nrt1.8-2* contain T-DNA insertion and were identified as described (Krysan et al., 1999). Primer sequence information is available in Supplemental Table 1 online. (C) and (D) Nitrate reallocation to roots as determined by the root/shoot nitrate ratio. Plants in the *nia1nia2* background were grown hydroponically with NH<sub>4</sub>HCO<sub>3</sub> as the only nitrogen source. At 4 weeks of age, plants were transferred to 2.25 mM NO<sub>3</sub><sup>-</sup> solution and subjected to 200 μM CdCl<sub>2</sub> or 150 mM NaCl for 12h (C), or 20 μM CdCl<sub>2</sub> or 50 mM NaCl for 72h (D). Tissues were then sampled and nitrate was extracted and determined. Data were normalized to fresh weight and ratio between roots and shoots (R/S) were calculated. Values are mean ± SD, n = 3.

Supplemental Table 1. List of primer sequences.

| Destination                        | Forward primer                  | Reverse primer                            |
|------------------------------------|---------------------------------|-------------------------------------------|
| <b>RT-PCR</b>                      |                                 |                                           |
| <i>SAND</i> expression             | GATGAGGATGATGCTTCTACG           | CCTGAGCGTTGTATCTTGGT                      |
| <i>ORA59</i> expression            | CAATCCTTCTTTTATCTAGCCCTAC       | CAGCACCTAAATCCTCAAGAACC                   |
| <i>ERF1B</i> expression            | GAATTCATGGATCCATTTTAAATTC       | GTCGACTCACCAAGTCCCACTATTTTC               |
| <i>ERF104</i> expression           | ATGGCAACTAAACAAGAAGC            | TGAAGTGACGGAGATAACGGAAAAGTTG              |
| <i>NRT1.8</i> expression           | TCTTTGCTTGGTGCTTTCCT            | ATCCGCTCTCTACTTTCTCAGC                    |
| <b>qRT-PCR</b>                     |                                 |                                           |
| <i>SAND</i> expression             | ATATGACACCCTTGCTTGGAGGGA        | TGAGAATAAGACACCAGACGCGCA                  |
| <i>ORA59</i> expression            | AAGGGATAAGAGTGTGGCTTGGGA        | CTTTCAAAGCGAAAGCCGCTGAT                   |
| <i>ERF1B</i> expression            | GAGGAAACACTCGATGAGACG           | GGAGCGGTGATCAAAGTCAC                      |
| <i>ERF104</i> expression           | GAACCATCACCAACCAATCC            | GTCCAAGCCAGATCCTACA                       |
| <i>ERF1A</i> expression            | TCCGGTCAAGAAGGAGAAGA            | GCCGTCTCAAACGTTCTTAA                      |
| <i>NRT1.8</i> expression           | TCTTCATCTTCGCATACAGGCGGT        | GCCATTATCGCAATCACAAGCCCA                  |
| <i>NRT1.5</i> expression           | TGGAGCGTTTCTCAGCGATT            | TCCATCATGGAATGTGAACCAC                    |
| <b>Genotyping</b>                  |                                 |                                           |
| Genotyping of <i>ora59-1</i>       | ATGCTGCAGACGGTAACAAAC           | CTTCAAGCTCATGGAGCTCAC                     |
| Genotyping of <i>ora59-2</i>       | GCCCACTCTTATCCCTTCC             | TTACTTTGGGATTGGTTGCAG                     |
| Genotyping of <i>erf104</i>        | CCTCTTGCTCAGTTGCTTGAC           | GAAACAGGCCCTAGAACCATC                     |
| Genotyping of <i>nrt1.5-4</i>      | TGAAAATTGTGTATACGAAACGAGA       | GGTGTCGATCATATATTTTCTCC                   |
| Genotyping of <i>nrt1.8-2</i>      | AGTTAGACAGTTTGAGGTTGCACTCAAG    | GTAGAATCTCTCAAGTGTCTTTGTTGA               |
| Genotyping of <i>ein3-1</i>        | TACCAAGTATCAAGCGGAG             | AGGCCACCAATCCTCTTTC                       |
| Genotyping of <i>eil1-1</i>        | GGGAATGGTGGAAAGATAAG            | CTTTCGCCGTATCTTATCC                       |
| Genotyping of <i>nia1</i>          | TACGACGACTCCTCAAGCGAC           | GGCTATAGATCCCGCATCGAC                     |
| Genotyping of <i>nia2</i>          | GTTCTTACAAACCTCCCCTTCC          | CTCTGTTGCTTGAATGGTAG                      |
| Genotyping of <i>ctr1-8</i>        | AGAGTCCACGACATATCTTG            | AGGAATCAGGCTCCATAAG                       |
| Genotyping of <i>eto1-1</i>        | GCAACACAATTGACCCTCTT            | GGGAGAATCCCTCAGAAAGG                      |
| <b>Protein expression and EMSA</b> |                                 |                                           |
| pET-30a(+) ORA59                   | GGATCCATGGAATATCAAACCTTCTC      | AAGCTT TCAAGAACATGATCTCATAAGC             |
| pET-30a(+) ERF1B                   | GAATTCATGGATCCATTTTAAATTC       | GTCGACTCACCAAGTCCCACTATTTTC               |
| pET-30a(+) ERF104                  | GTCGACTCATGGCAACTAAACAAGAAGC    | GCGGCCGC TCAAGTGACGGAGATAAC<br>GGAAAAGTTG |
| pGEX4T-1 EIN3 (N)                  | GGATCCATGATGTTTAAATGAGATGGGAATG | GAATTCACCAGACAGAGAAAAGAGGTGGAC            |
| <i>NRT1.8</i> promoter WT probe    | GATTTTATCAGTCTCTCCAGCAG         | CAATTTAATTGTAAGGTTTTGAAACG                |

|                                                        |                                                   |                                             |
|--------------------------------------------------------|---------------------------------------------------|---------------------------------------------|
| Mutate <i>NRT1.8</i><br>promoter WT<br>probe GCCbox B1 | TTTATCAGTCTCTCCATCATCCCTCC<br>AGGTGTAAGTGG        |                                             |
| Mutate <i>NRT1.8</i><br>promoter WT<br>probe GCCbox B2 | AATCCACCGAACATATATTTTATCATCCCGTT<br>TCAAAACCTTTAC |                                             |
| <i>NRT1.5</i> P5 fragment                              | TCTATAAGCATACGCATAAATGGA                          | CATATTGCCTCACAATCAATCTAG                    |
| <i>NRT1.5</i> P7 fragment                              | TATTGGTATTTAAACTTTGTTTACTA                        | TAAATGATATAAACGTTTAAAGTACTT                 |
| <b>ChIP-qPCR</b>                                       |                                                   |                                             |
| <i>TUB2</i> for ChIP<br>normalization                  | ATCCGTGAAGAGTACCCAGAT                             | AAGAACCATGCACTCATCAGC                       |
| <i>NRT1.8</i> P1<br>fragment                           | CTATTTAAGAACAATTATTTGGGG                          | CATCCCTAAAATCTATGAAGAAGG                    |
| <i>NRT1.8</i> P2<br>fragment                           | GCATATGATTATTATTGAGATAAC                          | GAGAGCTCAGAAATTGAGTCAG                      |
| <i>NRT1.8</i> P3<br>fragment                           | CACTTCTTCACTTTCCTCGA                              | AGATTGATTGGGTAGAG                           |
| ERFs binding sites in<br><i>PDF1.2</i> promoter        | TATACTTGTGTAAGTATGGCTTGG                          | TGTTGATGGCTGGTTTCTCCAC                      |
| EIN3 binding sites in<br><i>EBF2</i> promoter          | TGATGACAATTGGGTTCCGGTG                            | GTTTGTGATATTGAGAAGAAC                       |
| <i>NRT1.5</i> P1 fragment                              | GGCATGCTTGCGTTTAGTTAGGT                           | TCACTCAAACCTAAAATCATATTAC                   |
| <i>NRT1.5</i> P2 fragment                              | GTTGTTTTTAATCATGGGATTTATC                         | TTACACACTACAATATCTTTCATAA                   |
| <i>NRT1.5</i> P3 fragment                              | GTGTTTTGCATAGTAAATCGAATG                          | GCGGAGTAAAGTTTACATTATATC                    |
| <i>NRT1.5</i> P4 fragment                              | CAAGGGATTGACCTGTGGTAG                             | CGATTTTCATGAGGTTGCAATATC                    |
| <i>NRT1.5</i> P5 fragment                              | TCTATAAGCATACGCATAAATGGA                          | CATATTGCCTCACAATCAATCTAG                    |
| <i>NRT1.5</i> P6 fragment                              | TAGATTGATTGTGAGGCAATATG                           | AATCGTTGAGATCTAATTTTAGCT                    |
| <i>NRT1.5</i> P7 fragment                              | TATTGGTATTTAAACTTTGTTTACTA                        | TAAATGATATAAACGTTTAAAGTACTT                 |
| <i>NRT1.5</i> P8 fragment                              | ACAATGTTGTAGTTCACACAATGC                          | GTTGTTAGAAAAAAGAGGTACCAC                    |
| <b>Transient expression &amp; Plant transformation</b> |                                                   |                                             |
| <i>ERF1B</i> RNAi                                      | CCCGGG GCGCGGCC CAATCCACTAAC<br>GATCCCTAAC        | TCTAGA ATTTAAAT TTCTCTGACTTTC<br>TTGAGCTTAC |
| pGreenII 62-SK &<br>pCAMBIA 1300<br><i>ORA59</i>       | CTCGAG GGATCCATGGAATATCAA<br>ACTAACTTC            | GTCGACTGAAGAACATGATCTCATAAGCTC              |
| pGreenII 62-SK &<br>pCAMBIA 1300<br><i>ERF1B</i>       | TCTAGA GAATTC ATGGATCCAT<br>TTTTAATTC             | GTCGACTGACCAAGTCCCACTATTTTC                 |
| pGreenII 62-SK<br>&pCAMBIA 1300<br><i>ERF104</i>       | TCTAGA ATGGCAACTAAACAAGAAGC                       | CCCGGG<br>TGAAGTGACGGAGATAACGGAAAAGTTG      |
| pGreenII 62-SK<br><i>ERF1A</i>                         | GGATCCATGTCGATGACGGCGGATTC                        | CCCGGG TGATAAAACCAATAAACGAT<br>CGCCACG      |



|                                                |                                               |                                           |
|------------------------------------------------|-----------------------------------------------|-------------------------------------------|
| pGreenII 62-SK <i>ERF2</i>                     | GGATCCATGTACGGACAGTGCA<br>ATATAGAATC          | CCCGGG TGATGAAACCAATAACTCAT<br>CAACACG    |
| pGreenII 62-SK <i>ERF6</i>                     | GGATCCATGGCTACACCAACGAAG<br>TATCAGCTC         | CCCGGG TGAAACAACGGTCAATTG<br>TGGATAACC    |
| pGreenII 62-SK<br><i>ERF13</i>                 | TCTAGA GAATTC ATGAGCTCATCTG<br>ATCCGTTAATAACG | CCCGGG TGATATCCGATTATCAGAA<br>TAAGAACATTC |
| pGreenII 62-SK<br><i>ERF15</i>                 | GGATCCATGGAATATTCCAATC<br>TTCCATGTATTC        | CCCGGG TGAACATGAGTCATAAG<br>AAGTTGTTC     |
| <i>NRT1.8</i> promoter in<br>pGreenII 0800-LUC | AAGCTT CAATGAATCTAGACATTAATTCG                | GGATCCAGATTCGATTGGTGTAG<br>AGATATA        |
